# Supplementary material for: An Interactive City Choice Model and Its Application for Measuring the Intercity Interaction
Source: Frontiers journal article supplement (doi:10.3389/fphy.2022.850415), 2022-03-03
Supplement: Data_Sheet_1.pdf [file Data_Sheet_1.pdf]

## APPENDIX

According to the assumption of the OPS model [1], when an individual at location  $i$  makes a choice for location  $j$ , the probability of location  $j$  being selected is

$$Q_{ij} = \int_0^\infty \Pr_{m_i+s_{ij}}(z) \Pr_{m_j}(> z) dz, \quad (1)$$

where  $m_i$  is the number of opportunities at location  $i$ , and  $s_{ij}$  is the number of intervening opportunities (*i.e.*, the sum of the number of opportunities at all locations at a shorter distance to  $i$  than  $j$  [2]).  $z$  is a random variable with a continuous distribution  $p(z)$  representing the benefit of opportunities,  $\Pr_{m_i+s_{ij}}(z)$  is the probability that the maximum benefit obtained after  $m_i + s_{ij}$  sampling is exactly  $z$ , and  $\Pr_{m_j}(> z)$  is the probability that the maximum benefit obtained after  $m_j$  samplings is greater than  $z$ .

Since  $\Pr_x(< z) = p(< z)^x$ , we can obtain

$$\Pr_x(z) = \frac{d\Pr_x(< z)}{dz} = xp(< z)^{x-1} \frac{dp(< z)}{dz}. \quad (2)$$

Substituting eq. (2) in eq. (1), we obtain

$$\begin{aligned} Q_{ij} &= \int_0^\infty (m_i + s_{ij}) p(< z)^{m_i+s_{ij}-1} \frac{dp(< z)}{dz} [1 - p(< z)^{m_j}] dz \\ &= (m_i + s_{ij}) \int_0^1 [p(< z)^{s_{ij}+m_i-1} - p(< z)^{m_j+s_{ij}+m_i-1}] dp(< z) \\ &= (m_i + s_{ij}) \left( \frac{p(< z)^{s_{ij}+m_i}}{s_{ij} + m_i} \Big|_0^1 - \frac{p(< z)^{m_j+s_{ij}+m_i}}{m_j + s_{ij} + m_i} \Big|_0^1 \right) \\ &= (m_i + s_{ij}) \left( \frac{1}{s_{ij} + m_i} - \frac{1}{m_j + s_{ij} + m_i} \right) \\ &= \frac{m_j}{m_i + s_{ij} + m_j}. \end{aligned} \quad (3)$$

- 
- [1] Liu, E. and Yan, X. (2019). New parameter-free mobility model: Opportunity priority selection model. *Physica A* 526, 121023  
[2] Stouffer, S. A. (1940). Intervening opportunities: a theory relating mobility and distance. *Am. Sociol. Rev.* 5, 845-867
